# **Adrenaline rush in athletes: Visualizing glucose fluctuations during high-intensity races**

Taira Kajisa\*<sup>1,2</sup>, Toshiyuki Sakai<sup>3</sup>

<sup>1</sup> Graduate School of Interdisciplinary New Science, Toyo University, 2100 Kujirai, Kawagoe, Saitama 350-8585, Japan

<sup>2</sup> WorldTryout Inc.

Shinmaki-cho Building Annex 1st 2F,

Nihonbashi 3-2-14, Chuo-ku, Tokyo, Japan

<sup>3</sup> Department of Student, Student Support Division, Toyo University, 2100 Kujirai, Kawagoe, Saitama 350-8585, Japan

\*Corresponding author. E-mail: [kajisa@toyo.jp](mailto:kajisa@toyo.jp)

Affiliation: Graduate School of Interdisciplinary New Science, Toyo University, 2100 Kujirai, Kawagoe, Saitama 350-8585, Japan

Phone: +81-49-239-1375

## 1 **Abstract**

2 Under stressful or exciting conditions, athletes can perform beyond their typical capabilities  
3 during a so-called “adrenaline rush.” In the preliminary study by one sub-elite runner, we found  
4 that even in the fasted state, hyperglycemia occurs during high loaded running by the fact that  
5 both blood glucose and interstitial fluid glucose levels rose rapidly to 11-12 mM. This suggests  
6 that glycogen in the liver is degraded by anti-stress hormones, leading to an increase in glucose  
7 concentration. In the next, we analyzed the temporal changes in interstitial glucose concentration  
8 before, during, and after races using continuous glucose monitoring (CGM) data obtained from a  
9 total of 36 elite long-distance athletes including walking race (non-fasting state). We found that  
10 even healthy subjects recorded high glucose levels (mean  $8.3 \pm 1.5$  mM) before the start of the  
11 race and the glucose fluctuations during the race were also recorded at  $11.2 \pm 2.2$  mM,  
12 suggesting not only blood glucose level fluctuation due to supplementation before the races, but  
13 also due to the effects of stress hormones such as epinephrine, cortisol and glucagon.  
14 Furthermore, the mean glucose level during the daytime for the three days before the race event  
15 was significantly different by 0.3 mM ( $p < 0.001$ ) compared to the mean during the daytime for  
16 the three days after the race. These results suggested that efficient utilization of liver glycogen is  
17 important to keep high performance throughout the race, since the liver glycogen also consumed  
18 under stress.

19

## 1 INTRODUCTION

2 Athletes depend on both their physical and mental conditioning to perform at the top of their  
3 ability during crucial sporting moments. Mentally, the athlete's ability to regulate their mental  
4 strain or excitement can drastically impact the quality of their performance,<sup>1</sup> while physically,  
5 the athlete must be able to expend glucose without energy depletion during long periods of  
6 competition. Excessive mental strain can cause muscle tension, which impairs performance.  
7 Conversely, excessive excitement can sometimes trigger an "adrenaline rush"<sup>2-5</sup>, where an  
8 athlete's performance actually exceeds their typical ability. During competition, the muscles of  
9 high-level medium to long-distance athletes are constantly supplied with glucose for ATP  
10 production via glycolysis and the TCA cycle<sup>6</sup>. The athlete's blood glucose levels can be  
11 increased by two mechanisms: (1) oral intake of sugars; or (2) hyperglycemia induced by stress.  
12 In glucose concentration, the diagnostic criteria for diabetes include a fasting blood glucose level  
13 of higher than 7 mM, a 2-h post load plasma glucose higher than 11 mM after a 75g oral glucose  
14 tolerance test (OGTT) test, or a random blood glucose  $\geq 11.1$  mM (Use of glycated hemoglobin  
15 (HbA1c) in the diagnosis of diabetes mellitus)<sup>7-9</sup>. In normal subjects, while it has been reported  
16 that athletes rarely showed hyperglycemia ( $>10$  mM) during exercise, insulin secretion functions  
17 normally and rarely exceed 10 mM even during postprandial hyperglycemia. However, the  
18 research from bungee jumping experiments has shown that acute stress from strain can increase  
19 blood glucose levels<sup>10</sup>. As an athlete's ability to control their emotions can impact their blood  
20 glucose levels and their ability to use energy effectively, a possible mechanism for  
21 hyperglycemia under stress is the acceleration of glycogen degradation in the liver by anti-stress  
22 hormones<sup>11-14</sup>. Taken glucose from oral intake is stored in the liver and muscles as glycogen, on  
23 the other hand, glycogen degradation is accelerated by the secreted anti-stress hormones due to

1 excitement and tension leading to utilizing ATP production from muscle glycogen and releasing  
2 glucose in blood from liver glycogen<sup>15-20</sup>. Thus, it is required for athletes to control their  
3 emotions due to tension and excitement before the real race and to use energy effectively.

4 It is important for athletes to monitor their blood glucose levels during exercise to control  
5 energy balance and maintain performance<sup>21-23</sup>. Recent studies have examined the impact of  
6 continuous glucose monitoring (CGM) system on athletic performance<sup>24-29</sup>. In one study  
7 involving a sub-elite British soccer team, 70% players performed in a hyperglycemic state of  $\geq 6$   
8 mM with interstitial glucose level elevations during matches up to 10 mM<sup>27</sup>. Suzuki et al. also  
9 reported that athletes can experience interstitial glucose concentration increases up to 10 mM  
10 during long-distance running<sup>28</sup>. These studies are limited because they included little information  
11 regarding the balance of nutrient intake and energy expenditure or the impact of an athlete's  
12 mental status on blood glucose concentration. Additionally, with the goal of this study being to  
13 use CGM data during long-distance races in college track and field athletes, these studies had  
14 small sample sizes and did not include high-level athletes. We aimed, by monitoring glucose  
15 levels in the body before, during, and after highly competitive—and potentially mentally  
16 stressful—races, to examine the energy consumption of top runners.

17

## 1   **METHODS**

### 2   **Study subjects and collection of CGM data**

3           In this study, interstitial glucose levels in all runners were continuously monitored using  
4   FreeStyle Libre<sup>®</sup> flash glucose monitoring systems (FreeStyle Libre system; Abbott Diabetes  
5   Care, Alameda, CA) which apply patch-type CGM sensor under the skin of the upper arm. CGM  
6   data were collected for a total of 37 study subjects (one sub-elite subject for preliminary study,  
7   and for the main study, the total of 36 elite runners belonging to track and field in Toyo  
8   University).

9           To prove the correlation between blood glucose and interstitial fluid glucose levels during  
10   intense running and evaluate the measurement error and temporal discrepancies in blood glucose  
11   levels and interstitial fluid glucose concentrations by CGM during exercise, one healthy sub-elite  
12   runner (male, early 40's, HbA1c: 5.1, fasted plasma glucose level: 5.4 mM) measured blood  
13   glucose levels by Glutest Neo Alpha<sup>®</sup>, which is an enzymatic glucose sensor with finger prick  
14   using a Gentlet<sup>®</sup> (Sanwa Kagaku Kenkyusho Co. Ltd., Nagoya, Japan)) in parallel with the CGM  
15   measurement as a preliminary test. We examined the blood glucose levels during a race for the  
16   sub-elite subject who fasted for 12 h from 19:00 the previous day ran for 5 km distance equipped  
17   with CGM and with measured blood glucose level using self-monitoring of blood glucose  
18   (SMBG) every several tens of minutes. This athlete completed an OGTT after finishing his high-  
19   intensity running. Subsequently, for long-term monitoring of glucose levels before and after a  
20   full marathon race, this sub-elite completed a full marathon race during that period while  
21   wearing the CGM for 18 days.

1           In the main experiment, 20 college elite athletes (male, early 20's) who specialize in  
2 long-distance running or race walking participated in track, road race, and relay competitions  
3 while equipped with CGM, and a total of 36 CGM data were collected through the serious races  
4 without the fasted state. Participants were recruited from five months prior to each race. They  
5 satisfied the entry criteria for intercollegiate competitions as well as top long-distance races in  
6 Japan. Furthermore, the selection was made from athletes who had been chosen as the top  
7 performers within their respective teams. Detail regarding the athletic events included in this  
8 study are shown in Table 1.

9           All procedures were approved by the ethical review committee for medical research  
10 involving human subjects at Toyo University (TU2021-006). Data collection was carried out for  
11 all athletes after providing an explanation of the experimental methods and associated risks, and  
12 obtaining written informed consent through signed consent forms.

### 13 **Statistical analysis of CGM data**

14           To eliminate individual differences and biases in the numerical data, the CGM plots were  
15 statistically analyzed from a sufficient amount of data across various long-distance events to  
16 ensure robust results. In measuring glucose levels, the CGM automatically plotted 15-minute  
17 averages of glucose values per minute. In sub-elite runners, glucose variability data were plotted  
18 for 18 days. 36 glucose variability data for elite runners were plotted for one week, three days  
19 before and after each match day. Plotted glucose data was analyzed by statistical methods.  
20 Statistical analyses were performed using Microsoft Excel 2016 (Microsoft Corp., Redmond,  
21 WA, USA). We compared glucose levels before, during, and after races, using a one-way  
22 analysis of variance (ANOVA). Following the results of ANOVA, we performed pairwise

1 comparisons between timepoints using a two-tailed Welch's *t*-test. We also calculated summary  
2 statistics for glucose levels during each timepoint (mean, median, standard deviation,  
3 interquartile range).

4  
5 **Table 1.** Collected data information on athletes in actual races and their type of competition.

| Sample number | Type of competition                                                         | Race distance (km)                            | 6 |
|---------------|-----------------------------------------------------------------------------|-----------------------------------------------|---|
| n = 2         | Run, track                                                                  | 10                                            | 7 |
| n = 6         | Run, road (relay)                                                           | 5.8, 6.2, 6.4, 8.0, 8.5, 10.2                 | 8 |
| n = 8         | Run, road (relay)                                                           | 9.5, 11.1, 11.8, 11.9, 12.4, 12.8, 17.6, 19.7 |   |
| n = 8         | Run, road (relay)                                                           | 20.8, 20.9, 21.3, 21.4, 23.0, 23.1            |   |
| n = 1         | Run, cross country                                                          | 10                                            |   |
| n = 2         | Race walk, road                                                             | 20, 35                                        |   |
| n = 3         | Run, track                                                                  | 10                                            |   |
| n = 1         | Race walk, road                                                             | 10                                            |   |
| n = 2         | Run, road                                                                   | 21.0                                          |   |
| n = 3         | Run, track                                                                  | 5                                             |   |
| n = 36        | 16360 plots from 3 days before the race day to 3 days after the race<br>day |                                               |   |

## 1 RESULTS

### 2 Estimation and comparison of glucose level measured by self monitoring of blood glucose 3 (SMBG) and CGM during high-intensity running

4 In this study we found that CGM can be used to monitor blood glucose concentrations for high-  
5 level runners during races and these athletes' glucose levels differ before-, during-, and after-  
6 races. First, we evaluated the measurement error and temporal discrepancies in blood glucose  
7 levels by SMBG and interstitial fluid glucose concentrations by CGM during exercise. Figure 2  
8 displays the blood glucose data for a healthy sub-elite runner (male, 40 s, HbA1c: 5.1, fasted  
9 plasma glucose level: 5.4 mM) during fasting, running, and subsequent OGTT testing.

10 Figure 2 also shows the participant's glucose levels over time using both SMBG and  
11 CGM. The participant ran at an average pace of 4 min/km with maximum heart rate of 175 bpm  
12 during 12 h period fasting state and subsequent oral glucose ingestion after running. During  
13 high-intensity running, the maximum glucose level recorded 12.2 mM for SMBG and 11.3 mM  
14 for CGM despite of fasting conditions. Immediately after running, when glucose levels returned  
15 to the normal level, the participant completed a glucose endurance test. After ingesting glucose,  
16 the participant's blood glucose levels were recorded at a maximum of 7.7 mM in SMBG and 6.3  
17 mM in CGM after approximately 30 min and returned to normal levels after 1 h. The average  
18 blood glucose value measured by CGM was 1.5 mM lower than that of SMBG. Additionally, we  
19 observed a delay of about 15 min in the speed of glucose rise during running in the CGM  
20 measurement compared to the SMBG measurement.

21 In the next experiment, interstitial fluid glucose monitoring data of the same male sub-  
22 elite athlete was collected for 18 days before and after the full marathon race with non-fasting  
23 state (Fig. 3). First, we focused on sleeping time between 1 am and 7 pm and found the CGM



1 values were about 3.5 mM lower the day before the race. CGM values during sleeping time on  
2 race day were higher than the average values and did not fluctuate. Then, the participants'  
3 glucose level increased sharply up to 10 mM just before the start time of the race. During the  
4 race, the participant's CGM values were consistently above 10 mM with a maximum value of  
5 11.7 mM during the race's midpoint. The participant's CGM values were consistently above 7  
6 mM until 4 h after finishing the race. On the night after the race, he slept with extraordinarily  
7 higher blood glucose values between 5.7 and 9.6 mM. Compared with the average CGM values  
8 during the race (average pace of 4:14 min/km) and the CGM values in the full marathon practice  
9 at relatively low intensity (average pace of 6:16 min/km), it was cleared that the CGM value was  
10 quite higher during the race, while the values during the practice remained within 5 to 6 mM and  
11 the average value was  $5.4 \pm 1.1$  mM (Fig. S1).

12

### 13 **Statistical analysis of blood glucose levels in elite long-distance runners during races**

14 We obtained interstitial glucose data using CGM device from elite runners and race walkers at  
15 various locations and times, which are 5000 and 10000 m track races, 5.8 to 35 km road races,  
16 and relay races. Table 1 shows the date and time when the sample data was collected, the number  
17 of subjects, the type and location of the race, and the distance. A total of 16360 glucose data  
18 plots were collected from 36 athletes between early 20's. All athletes were considered healthy  
19 based on their fasting blood glucose and HbA1c levels collected during their physical  
20 examinations.

21 Figure 4 shows real-time data on the variation in mean body glucose levels by CGM from  
22 2 h before the start to post-race for representative athletes in various competitive events.  
23 Although individual differences were observed in pre-race glucose variability, many athletes

1 demonstrated a pattern of glucose elevation during the race and acute elevation of glucose levels  
2 just before starting. Many athletes also demonstrated an increase in glucose approximately 90  
3 min before their race, which corresponded with the timing of a supplemental meal. The athletes'  
4 mean glucose levels also continued to rise gradually during the race. After the race ended, a  
5 sharp drop in glucose levels was characteristically observed within an hour.

6 Figure 5a plots the glucose levels for each individual participant from 3 days before and after  
7 the actual races. In Fig. 5b, we analyzed glucose levels around the race by dividing CGM  
8 readings into 1 h before the race, during the race, and the 1 h after the race. The overall mean  
9 value of blood glucose was  $6.1 \pm 1.3$  mM. The mean value of glucose rose to  $8.3 \pm 1.5$  mM at 1 h  
10 before the race and increased to  $11.2 \pm 2.2$  mM during the race. Mean glucose levels then  
11 dropped to  $6.7 \pm 1.7$  mM at 1 h after the race. The median values were 8.3 mM (IQR: 1.4 mM) at  
12 1 h before the race, 11.1 mM (IQR: 2.8 mM) during the race, and 6.6 mM (IQR: 2.7 mM) at 1 h  
13 after the race. These data indicate that glucose values were higher before and during races  
14 compared to the other timeframes. Athletes' glucose levels before and after the race day were  
15 also compared. Figure 5c shows the distribution of daily glucose fluctuations during the 3 days  
16 before and after the race. Daily glucose levels for the 3 days before the race were  $6.4 \pm 0.7$  mM,  
17 whereas daily glucose levels for the 3 days after the race were  $6.1 \pm 1.1$  mM. The difference of  
18 0.3 mM in daily glucose values for the three days before and after the race was statistically  
19 significant with a p-value of  $<0.001$ .

20

## 1 DISCUSSION

2           The phenomenon of increased blood/interstitial glucose levels during exercise has been  
3 previously reported<sup>27</sup>. While most of these studies were conducted during controlled exercise  
4 tests, which provides little information about the potential influence of mental stress or  
5 excitement on blood glucose levels, it has been reported that increased epinephrine in the body is  
6 correlated with elevated blood glucose levels during exercise<sup>30</sup>. However, in this study, we used  
7 CGM to monitor body glucose levels in real-time during actual racing competitions. Therefore,  
8 at first in this report, blood glucose and interstitial fluid glucose values were compared during  
9 high-intensity running using one sub-elite runner as a preliminary test. We observed an  
10 approximately 15-minute lag for CGM values compared to SMBG values (Fig. 2). We inferred  
11 this time discrepancy reflected a displacement in the time of fluid seepage from the blood to the  
12 interstitial fluid. The correlation between blood glucose and interstitial fluid glucose  
13 concentrations and the time lag in the variation of blood glucose and interstitial fluid glucose  
14 concentrations with freestyle libre were consistent with previous reports<sup>31,32</sup>. Additionally, we  
15 found that both SMBG and CGM detected hyperglycemia during and after one participant's race  
16 despite his fasted state (Fig. 2). These results suggest that the increase in blood glucose levels  
17 during high-intensity running could be due to glucose release by the breakdown of glycogen in  
18 the liver caused by the secretion of anti-stress hormones since the low potential for oral glucose  
19 source supply. While the results of this study are consistent with this mechanism of  
20 hyperglycemia, it is known that plasma concentrations of glucagon and adrenaline increase when  
21 the brain recognizes a decrease in glucose concentration, which causes hyperglycemia<sup>33</sup>, and,  
22 because we observed glucose concentration above 10 mM before the start of the race, this level  
23 continued to rise up to 11.7 mM during the race. We believe this increased blood glucose

1 concentration may have been caused by an increase in anti-stress hormones due to tension and  
2 excitement associated with the competition (Fig. 3). It has been reported that moderate exercise  
3 lowers body glucose levels<sup>28</sup>. While, supporting the importance of oral glucose supplementation  
4 during races is the fact that healthy subjects continued to maintain a hyperglycemic state of more  
5 than 8 mM (mean  $+2\sigma$ ) for as long as 6 h before and after the marathon race, it has additionally  
6 been suggested that elite athletes consume most glucose in the blood during competition leading  
7 to increased liver glycogen degradation.

8 In the next experiment, from the CGM data of the total 36 elite runners in serious race events,  
9 their glucose variability made it possible to determine their state of tension and excitement  
10 before, during, and after the race. In Figure 4, the real-time data on glucose variability were  
11 shown for races of different distances, locations, and competitions. In terms of the results, the  
12 data range from personal best records (Fig. 4a and 4c), including world record (Fig. 4d), to  
13 personal worst records (Fig. 4b), suggesting the possibility of a correlation between the results  
14 and the glucose patterns. Our sample size of 36 subjects and 16360 points were sufficient for this  
15 statistical analysis (Fig. 5a). From the evaluation of the distribution at a different stage of the  
16 serious race, the glucose elevation was observed 1 h before the race, presumably due to tension  
17 and excitement, which differed by more than 2 mM compared with the mean value of the total  
18 glucose level from 3 days before the race and 3 days after (Fig. 5c). This pre-race glucose  
19 distribution value was assumed to be due to excitement and tension, since the athletes consumed  
20 the pre-race supplementation 1.5 to 2 h before the start time of the race, and the glucose  
21 elevation due to the supplementation did not exceed 8 mM on average (Fig. 5b). Moreover,  
22 glucose values were nearly twice as high compared to normal values during the race at 11.1 mM.  
23 Usually, the test collaborators have trained at the same pace of the race one week before.

1 Although the pattern of glucose variability in the high-intensity practice and that of the race were  
2 similar, it was significantly higher in the race event during running (Fig. S2). Glycogen is stored  
3 up to about 100 g in the liver, whereas 500 g is stored in muscle cells<sup>34-36</sup>. However, it has been  
4 reported that glycogen stored in muscle cells cannot release glucose into blood vessels<sup>15</sup>. In other  
5 words, the results of this study suggested that the only the factors in raising the glucose level  
6 were the glycogen source in the liver, which was heavily consumed during the main race, in  
7 addition to the amount of carbohydrates by oral ingestion. In addition, the average glucose values  
8 at a daytime were higher before the race, not only one hour before the start, but also three days  
9 before, suggesting that glucose consumption was increasing through daytime. Mullin *et al.* found  
10 that the glucose consumption of 19 female heptathlon athletes was 339 g/day<sup>37</sup>. For this amount  
11 of glucose consumption, carbohydrates are released successively into the blood by oral and  
12 glycogen consumption to maintain a normal blood glucose level of around 5 mM. Namely,  
13 assuming that a nervous or excited runner raises his/her glucose level to about 10 mM before the  
14 race, and then to about 15 mM during the race, he/she would be releasing about 70 g of glucose  
15 into the blood from 1 h before the race to 1 h during the race. Thus, it is estimated that liver  
16 glycogen may be depleted during exercise in extreme tension and excitement. It has been  
17 reported that exercise at 75% of maximal oxygen uptake for at least 150 min does not cause  
18 hypoglycemia and continued to work for 180 min up to complete exhaustion if muscle glycogen  
19 levels are sufficient<sup>38</sup>, and further that people can move for nearly 90 min without hypoglycemia  
20 even when muscle glycogen levels are considerably depleted<sup>39</sup>. From these reports, whereas  
21 depletion of glycogen in the liver during exercise makes it difficult to maintain blood glucose  
22 levels or increases the likelihood of metabolic system switches to gluconeogenesis, which in turn

1 increases the risk of failure, depletion of glycogen in the liver does not mean that the athletes will  
2 collapse due to hypoglycemia even if glycogen in the liver is depleted.

3 There exist certainly many associated factors in blood glucose levels during exercise, not  
4 limited the blood glucose factor. For example, it is also important how re-metabolized glucose  
5 levels (e.g. from lactate) are accrued during all competitive races in athletes<sup>40,41</sup>. However, the  
6 only biomarker that can monitor in real-time during the actual race is the interstitial fluid glucose  
7 level in current, so that it is desirable to develop continuous lactate monitoring in the future.  
8 Furthermore, continuous glucose monitoring should be combined with heart rate and maximal  
9 oxygen consumption and analyzed in correlation to reveal running events occurring in the blood.  
10 The conclusion from the continuous glucose monitoring in this research is that it is necessary to  
11 consume the limited glycogen in the liver efficiently in addition to supplying sugar through oral  
12 intake and by controlling the tension and excitement through the race in order to maintain high  
13 performance in the race.

14

## 15 **CONCLUSION**

16 This study suggested that glucose level fluctuates due to the effects of stress hormones  
17 such as epinephrine, cortisol, and glucagon. To bring out the full power of the athletes' abilities  
18 and keep their energy up during the real race, efficient utilization of liver glycogen while  
19 controlling excitement and tension is important to keep high performance throughout the race  
20 since the liver glycogen is also consumed under stress.

21

## 22 **ACKNOWLEDGEMENTS**

1 Part of this work was supported by HAKUJU INSTITUTE FOR HEALTH SCIENCE  
2 Co., Ltd., Nisshinbo Holdings Inc., and Japan Keirin Autorace Foundation. The authors wish to  
3 thank all of the healthy athletes who participated in the project.

#### 4 **REFERENCES**

- 5 1. Palazzolo J, Hume PA. Anxiety and performance. *L'Encéphale*. 2020;46:158–161.  
6 <http://doi.org/10.1016/j.encep.2019.11.005> PMID: 31974013  
7
- 8 2. Schmidt KT, Weinshenker D. Adrenaline rush: The role of adrenergic receptors in stimulant-induced  
9 behaviors. *Mol Pharmacol*. 2014;85:640–650. <http://doi.org/10.1124/mol.113.090852> PMID: 24478319  
10
- 11 3. Galbo H, Holst JJ, Christensen NJ. Glucagon and plasma catecholamine responses to graded and  
12 prolonged exercise in man. *J Appl Physiol*. 1975;38:70–76. <http://doi.org/10.1152/jappl.1975.38.1.70>  
13 PMID: 1111446  
14
- 15 4. Winder WW, Hagberg JM, Hickson RC, Ehsani AA, McLane JA. Time course of sympathoadrenal  
16 adaptation to endurance exercise training in man. *J Appl Physiol*. 1978;45:370–374.  
17 <http://doi.org/10.1152/jappl.1978.45.3.370> PMID: 691190  
18
- 19 5. Kindermann W, Schnabel A, Schmitt WM, Biro G, Hippchen M. Catecholamine, STH, cortisol,  
20 glucagon, insulin und sexualhormone bei körperlicher belastung und beta1–blockade. *Klin Wochenschr*.  
21 1982;60:505–512. <http://doi.org/10.1007/BF01716997> PMID: 7079540  
22
- 23 6. Hargreaves M, Spriet LL. Skeletal muscle energy metabolism during exercise. *Nat Metab*.

- 1 2020;2:817–828. <http://doi.org/10.1038/s42255-020-0261-4> PMID: 32848246
- 2
- 3 7. World Health Organization, International Diabetes Federation. Definition and diagnosis of diabetes  
4 mellitus and intermediate hyperglycaemia: Report of a WHO/IDF consultation. Geneva: World Health  
5 Organization, 2006.
- 6
- 7 8. d'Emden MC, Shaw JE, Jones GR, Cheung NW. Guidance concerning the use of glycated  
8 haemoglobin (HbA1c) for the diagnosis of diabetes mellitus. *Med J Aust.* 2015;203:89–90.  
9 <http://doi.org/10.5694/mja15.00671> PMID: 26165325
- 10
- 11 9. John WG, on behalf of the UK Department of Health Advisory Committee on Diabetes. Use of  
12 HbA1c in the diagnosis of diabetes mellitus in the UK. The implementation of World Health  
13 Organization guidance 2011. *Diabet Med.* 2012;29:1350–1357. <http://doi.org/10.1111/j.1464->  
14 [5491.2012.03733.x](http://doi.org/10.1111/j.1464-5491.2012.03733.x) PMID: 22845482
- 15
- 16 10. Kruyt ND, van Westerloo DJ, DeVries JH. Stress-induced hyperglycemia in healthy bungee jumpers  
17 without diabetes due to decreased pancreatic  $\beta$ -cell function and increased insulin resistance. *Diabetes*  
18 *Technol Ther.* 2012;14:311–314. <http://doi.org/10.1089/dia.2011.0197> PMID: 22316092
- 19
- 20 11. Rui L. Energy metabolism in the liver. *Compr. Physiol.* 2014; 4: 177–197.  
21 <https://doi.org/10.1002/cphy.c130024> PMID: 24692142
- 22
- 23 12. Qiao S, Li X, Zilioli S, Chen Z, Deng H, Pan J, Guo W. Hair measurements of cortisol, DHEA, and



- 1 DHEA to cortisol ratio as biomarkers of chronic stress among people living with HIV in china: known-  
2 group validation. PLoS One 2017; 12: e0169827. <http://doi.org/10.1371/journal.pone.0169827> PMID:  
3 28085952  
4
- 5 13. Sherwin RS, Saccà L. Effect of epinephrine on glucose metabolism in humans: contribution of the  
6 liver. *Am. J. Physiol.* 1984; 247: E157–165. <https://doi.org/10.1152/ajpendo.1984.247.2.e157> PMID:  
7 6382039  
8
- 9 14. Ramnanan CJ, Edgerton DS, Kraft G, Cherrington AD. Physiologic action of glucagon on liver  
10 glucose metabolism. *Diabetes Obes. Metab.* 2011; 13 Suppl 1: 118–125. <http://doi.org/10.1111/j.1463->  
11 [1326.2011.01445.x](http://doi.org/10.1111/j.1463-1326.2011.01445.x) PMID: 21824269  
12
- 13 15. Jensen J, Rustad PI, Kolnes AJ, Lai YC. The role of skeletal muscle glycogen breakdown for  
14 regulation of insulin sensitivity by exercise. *Front. Physiol.* 2011; 2: 112.  
15 <http://doi.org/10.3389/fphys.2011.00112> PMID: 22164153  
16
- 17 16. Nirupama R, Barathi R, Yajurvedi HN. Stress and glucose metabolism: A review. *Imaging J. Clin.*  
18 *Med. Sci.* 2018; 5: 8–12. <http://doi.org/10.17352/2455-8702.000037>  
19
- 20 17. Fujiwara T, Cherrington AD, Neal DN, McGuinness OP. Role of cortisol in the metabolic response  
21 to stress hormone infusion in the conscious dog. *Metabolism* 1996; 45: 571–578.  
22 [https://doi.org/10.1016/s0026-0495\(96\)90026-8](https://doi.org/10.1016/s0026-0495(96)90026-8) PMID: 8653865  
23

- 1 18. Hems DA, Rodrigues LM, Whitton PD. Rapid stimulation by vasopressin, oxytocin and angiotensin  
2 II of glycogen degradation in hepatocyte suspensions. *Biochem. J.* 1978; 172: 311–317.  
3 <http://doi.org/10.1042/bj1720311> PMID: 678954  
4
- 5 19. Sharma RJ, Rodrigues LM, Whitton PD, Hems DA. Control mechanisms in the acceleration of  
6 hepatic glycogen degradation during hypoxia. *Biochim. Biophys. Acta* 1980; 630: 414–424.  
7 [https://doi.org/10.1016/0304-4165\(80\)90290-1](https://doi.org/10.1016/0304-4165(80)90290-1) PMID: 6771259  
8
- 9 20. Hems DA, Whitton PD. Control of hepatic glycogenolysis. *Physiol. Rev.* 1980; 60: 1–50.  
10 <http://doi.org/10.1152/physrev.1980.60.1.1> PMID: 6987242  
11
- 12 21. Levine SA, Gordon B, Derick CL. Some changes in the chemical constituents of the blood following  
13 a marathon race: With special reference to the development of hypoglycemia. *J. Am. Med. Assoc.* 1924;  
14 82: 1778–1779. <http://doi.org/10.1001/jama.1924.02650490018005>  
15
- 16 22. Moore DR. Nutrition to support recovery from endurance exercise: Optimal carbohydrate and  
17 protein replacement. *Curr Sports Med Rep.* 2015;14: 294–300.  
18 <http://doi.org/10.1249/JSR.0000000000000170> PMID: 26166054  
19
- 20 23. Olsson J. Swedish elite swimmers blood glucose levels during recovery: A descriptive study using  
21 continuous glucose monitoring systems independent thesis basic level (degree of Bachelor) thesis. 2017.  
22
- 23 24. Ishihara K, Uchiyama N, Kizaki S, Mori E, Nonaka T, Oneda H. Application of continuous glucose

- 1 monitoring for assessment of individual carbohydrate requirement during ultramarathon race. *Nutrients*.  
2 2020;12: 1121. <http://doi.org/10.3390/nu12041121> PMID: 32290319  
3
- 4 25. Hill NE, Deighton K, Matu J, Misra S, Oliver NS, Newman C, Mellor A, O'Hara J, Woods D.  
5 Continuous glucose monitoring at high altitude—effects on glucose homeostasis. *Med Sci Sports Exerc*.  
6 2018;50: 1679–1686. <http://doi.org/10.1249/MSS.0000000000001613> PMID: 29596016  
7
- 8 26. Holzer R, Bloch W, Brinkmann C. Continuous glucose monitoring in healthy adults—possible  
9 applications in health care, wellness, and sports. *Sensors (Basel)*. 2022;22.  
10
- 11 27. Thomas F, Pretty CG, Desai T, Chase JG. Blood glucose levels of subelite athletes during 6 days  
12 of free living. *J Diabetes Sci Technol*. 2016;10: 1335–1343. <http://doi.org/10.1177/1932296816658901>  
13 PMID: 27440892  
14
- 15 28. Suzuki Y, Shimizu T, Ota M, Hirata R, Sato K, Tamura Y, Imanishi A, Watanabe M, Sakuraba K.  
16 Different training status may alter the continuous blood glucose kinetics in self-paced endurance  
17 running. *Exp Ther Med*. 2015;10: 978–982. <http://doi.org/10.3892/etm.2015.2655> PMID: 26622533  
18
- 19 29. Bowler AM, Whitfield J, Marshall L, Coffey VG, Burke LM, Cox GR. The use of continuous  
20 glucose monitors in sport: Possible applications and considerations. *Int J Sport Nutr Exerc Metab*.  
21 2023;33: 121–132. <https://doi.org/10.1123/ijsnem.2022-0139> PMID: 36572039  
22
- 23 30. Howlett K, Galbo H, Lorentsen J, Bergeron R, Zimmerman–Belsing T, Bülow J, Feldt–Rasmussen

- 1 U, Kjær M. Effect of adrenaline on glucose kinetics during exercise in adrenalectomised humans. *J*  
2 *Physiol.* 1999;519 Pt 3: 911–921. <http://doi.org/10.1111/j.1469-7793.1999.09110.x> PMID: 10457072  
3
- 4 31. Rebrin K, Steil GM. Can interstitial glucose assessment replace blood glucose measurements?  
5 *Diabetes Technol Ther.* 2000;2: 461–472. <http://doi.org/10.1089/15209150050509137> PMID: 11467334  
6
- 7 32. Rebrin K, Sheppard NF Jr, Steil GM. Use of subcutaneous interstitial fluid glucose to estimate blood  
8 glucose: revisiting delay and sensor offset. *J Diabetes Sci Technol.* 2010;4: 1087–1098.  
9 <http://doi.org/10.1177/193229681000400503> PMID: 20920432  
10
- 11 33. Sanders NM, Ritter S. Repeated 2-deoxy-D-glucose-induced glucoprivation attenuates Fos  
12 expression and glucoregulatory responses during subsequent glucoprivation. *Diabetes.* 2000;49: 1865–  
13 1874. <http://doi.org/10.2337/diabetes.49.11.1865> PMID: 11078466  
14
- 15 34. Wasserman DH. Four grams of glucose. *Am J Physiol Endocrinol Metab.* 2009;296: E11–21.  
16 <http://doi.org/10.1152/ajpendo.90563.2008> PMID: 19001594  
17
- 18 35. Hargreaves M, Spriet LL. Skeletal muscle energy metabolism during exercise. *Nat Metab.* 2020;2:  
19 817–828. <http://doi.org/10.1038/s42255-020-0251-4> PMID: 32694784  
20
- 21 36. Taylor R, Magnusson I, Rothman DL, Cline GW, Caumo A, Cobelli C, Shulman GI. Direct  
22 assessment of liver glycogen storage by <sup>13</sup>C nuclear magnetic resonance spectroscopy and regulation of  
23 glucose homeostasis after a mixed meal in normal subjects. *J Clin Invest.* 1996;97: 126–132.

1 <http://doi.org/10.1172/JCI118382> PMID: 8550843

2

3 37. Mullins VA, Houtkooper LB, Howell WH, Going SB, Brown CH. Nutritional status of U.S. elite  
4 female heptathletes during training. *Int J Sport Nutr Exerc Metab.* 2001;11: 299–314.

5 <http://doi.org/10.1123/ijsnem.11.3.299> PMID: 11591826

6

7 38. Bergström J, Hermansen L, Hultman E, Saltin B. Diet, muscle glycogen and physical performance.

8 *Acta Physiol Scand.* 1967;71: 140–150. <http://doi.org/10.1111/j.1748-1716.1967.tb03720.x> PMID:

9 4968123

10

11 39. Christensen EH, Hansen O. Hypoglykämie, Arbeitsfähigkeit und Ermüdung<sup>1</sup>. *Skand Arch Physiol.*

12 1939;81: 172–179.

13

14 40. Messonnier LA, Chatel B, Emhoff CW, Blervaque L, Oyono-Enguéllé S. Delayed rebound of

15 glycemia during recovery following short-duration high-intensity exercise: Are there lactate and glucose

16 metabolism interactions? *Front Nutr.* 2021;8:734152. <http://doi.org/10.3389/fnut.2021.734152> PMID:

17 34178971

18

19 41. Yang WH, Park H, Grau M, Heine O. Decreased blood glucose and lactate: is a useful indicator of

20 recovery ability in athletes? *Int J Environ Res Public Health.* 2020;17:5470.

21 <http://doi.org/10.3390/ijerph17155470> PMID: 32640758

22

23 **SUPPORTING INFORMATION**

1 The Supporting Information is available free of charge at DOI:\*\*\*.

2

3 **Author Information**

4 **Corresponding Author**

5 **Taira Kajisa** – Graduate School of Interdisciplinary New Science, Toyo University, 2100

6 Kujirai, Kawagoe, Saitama 350-8585, Japan;

7 Phone: +81-49-239-2375; Email: [kajisa@toyo.jp](mailto:kajisa@toyo.jp)

8

9 **Author**

10 **Toshiyuki Sakai** –Department of Student, Student Support Division, Toyo University, 2100

11 Kujirai, Kawagoe, Saitama 350-8585, Japan

12

13 **Notes**

14 The authors declare no competing interests.

15

16

## 1 **Figure Legends**

2 **Figure 1.** Mechanism of blood glucose elevation by secreted anti-stress hormones promoted  
3 from stress factors such as tension and excitement.

4

5 **Figure 2.** Time course graph of glucose level fluctuation by self-monitoring blood glucose  
6 (SMBG) and continuous glucose monitoring (CGM) during high-intensity running and glucose  
7 tolerance test after 12 h of fasting (Red: SMBG, Blue: CGM).

8

9 **Figure 3.** Interstitial glucose concentration plots of 1 sub-elite runner before and after a full  
10 marathon race (Blue: 1 day before the race, Red: race day, Green: 1 day after the race). Average,  
11 average plus a standard deviation, and average plus two standard deviations are indicated as pink,  
12 yellow, and skin color line, respectively.

13

14 **Figure 4.** Changes in interstitial fluid glucose concentration from long-distance elite athletes  
15 before/during/after race competitions of different disciplines (a: 10 km running track, b: 12.8 km  
16 relay on road, c: 21.1 km half-marathon on road, d: 35 km race walk on road). The pink band  
17 indicates the running time with the start time as 0 min.

18

1 **Figure 5.** Statistical results and analysis from elite long-distance athletes in the real competition.  
2 (a): Actual data plots of interstitial glucose level for 7 consecutive days before and after 3 days  
3 of the race day. (b): The results in statistical analysis of interstitial glucose data before 1 h (blue),  
4 during the race (red), after 1 h (green), and total data (gray). (c): Comparison of statistical data  
5 with before 3 days (blue) and after 3 days of the race (green).  
6
